# Supplementary material for: Emerging role of LETM1/GRP78 axis in lung cancer
Source: PubMed Central journal article supplement (PMC9184611; doi:10.1038/s41419-022-04993-5), 2022-06-10
Supplement: 41419_2022_4993_MOESM6_ESM.pdf [file 41419_2022_4993_MOESM6_ESM.pdf]

Figure 1E anti-LETM1

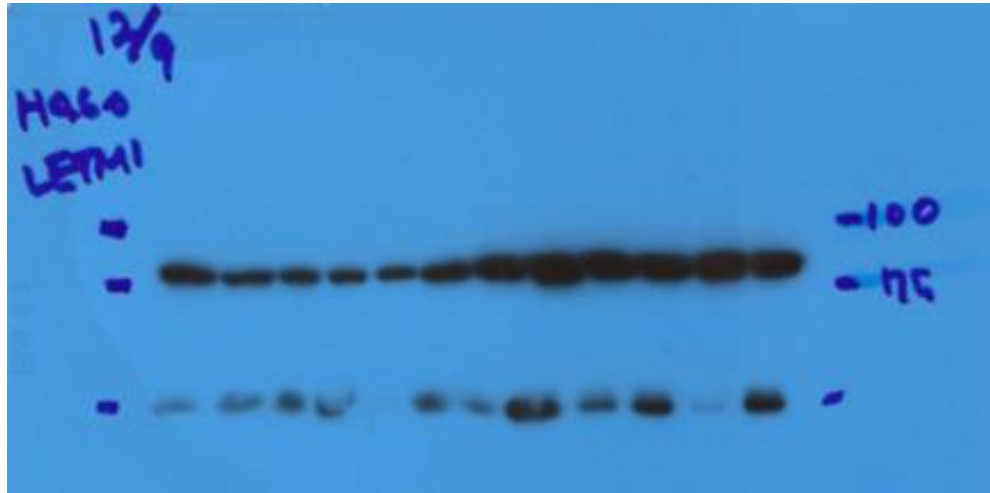

Figure 1E anti-LC3B

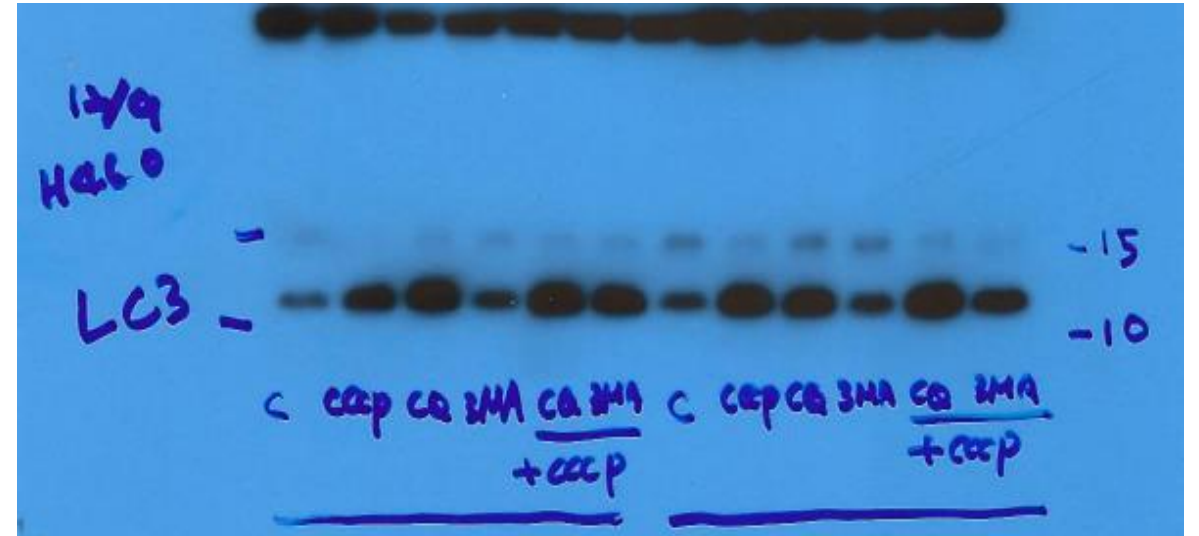

Figure 1E anti-p62

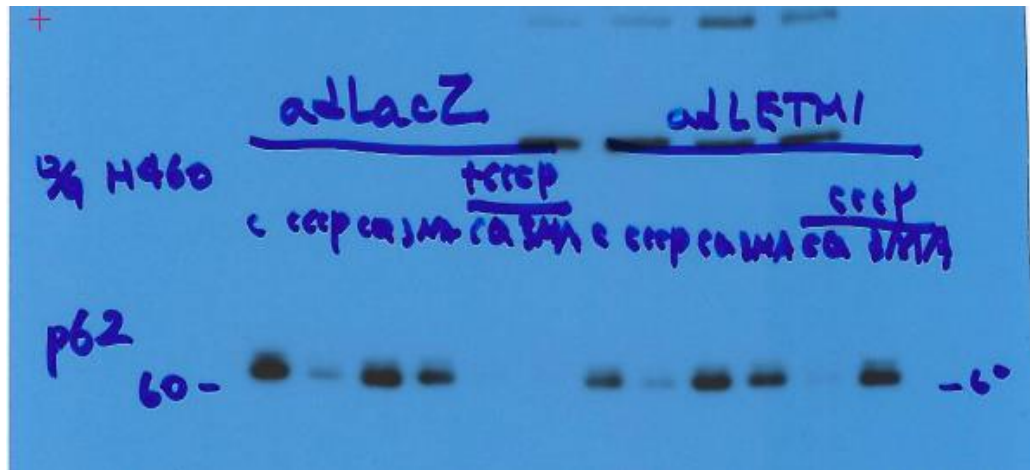

Figure 1E anti-beta-actin

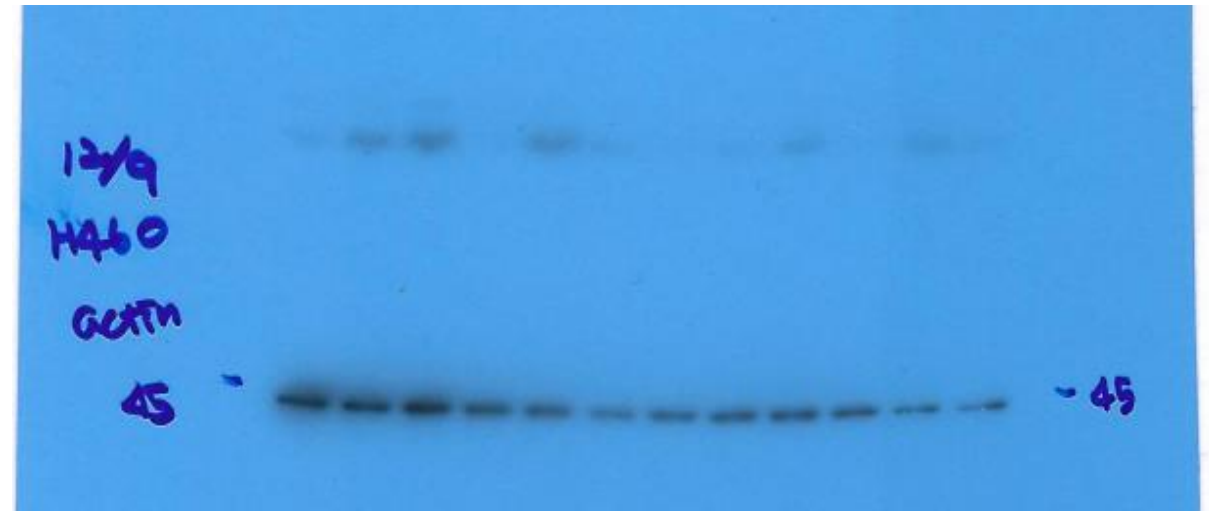

**Figure 4E anti-GRP78**

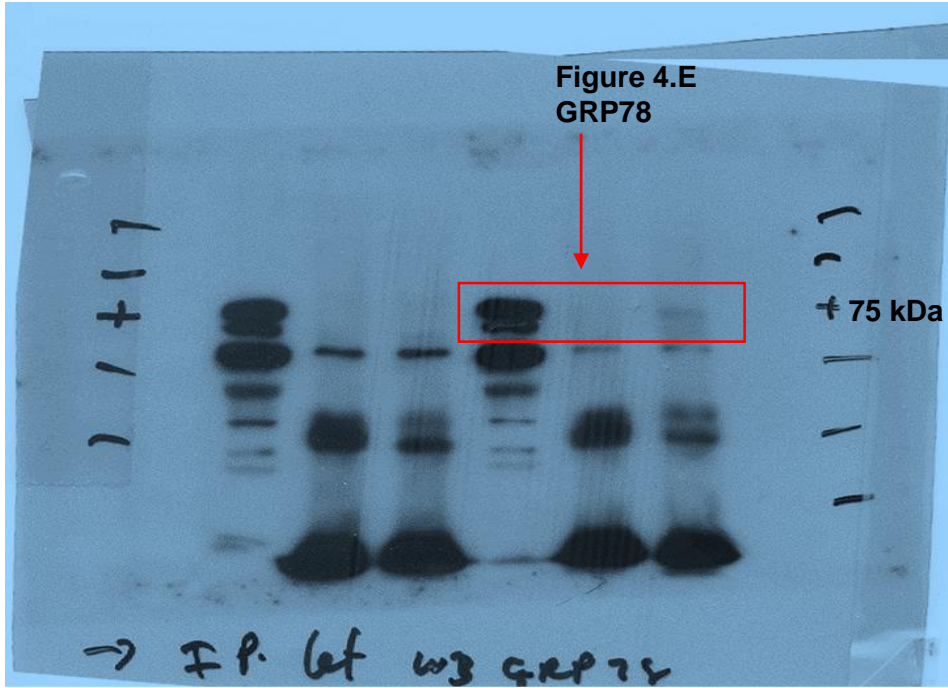

**Figure 4E anti-LETM1**

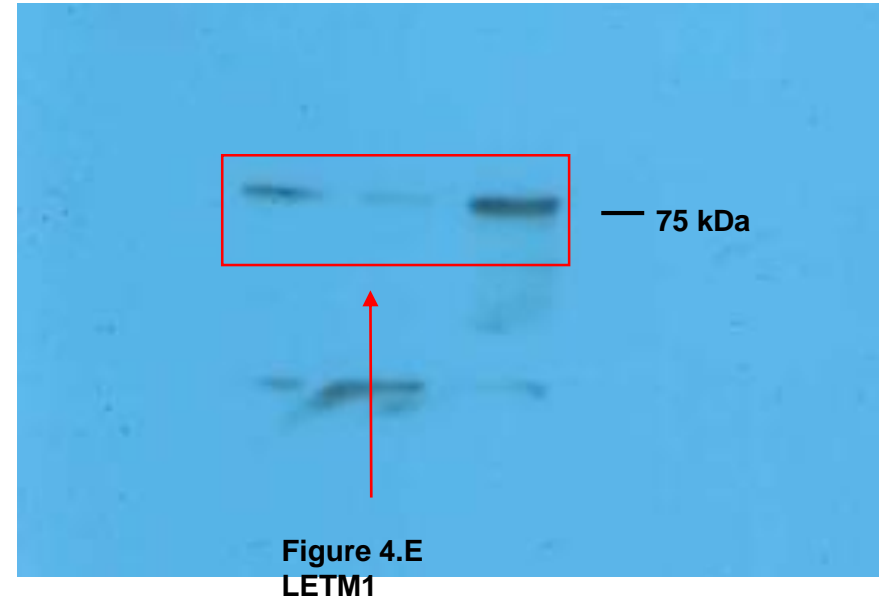

**Figure 4F** anti-GRP78

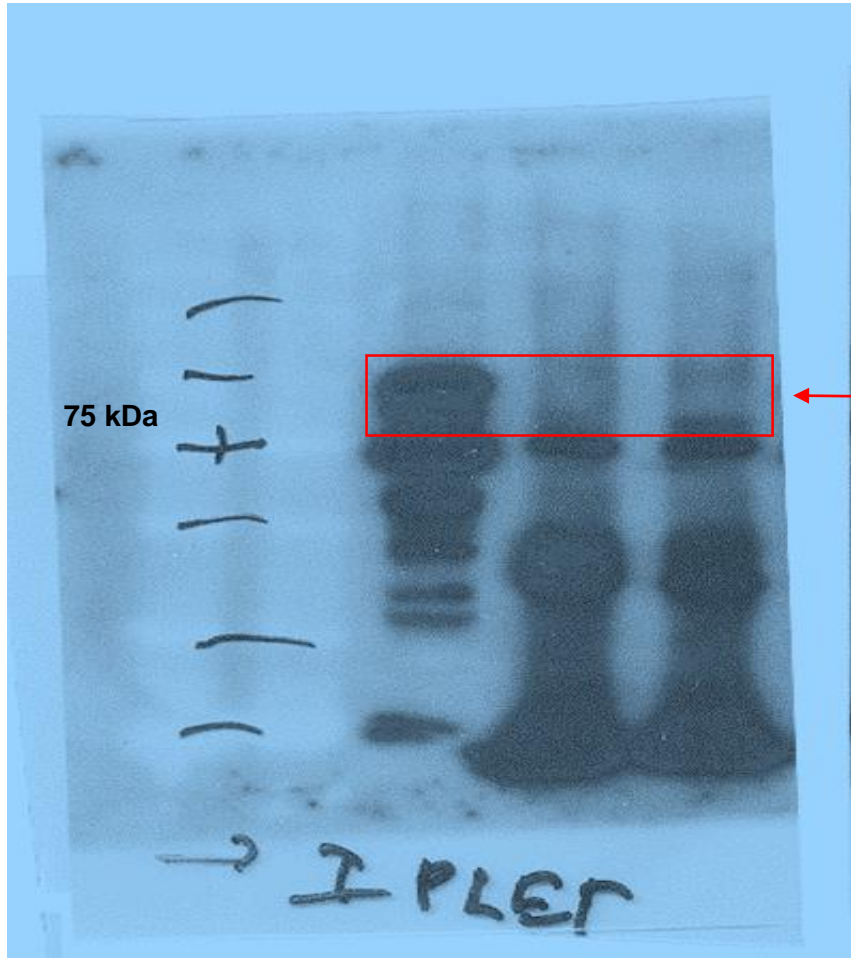

**Figure 4F**  
GRP78

**Figure 4F** anti-LETM1

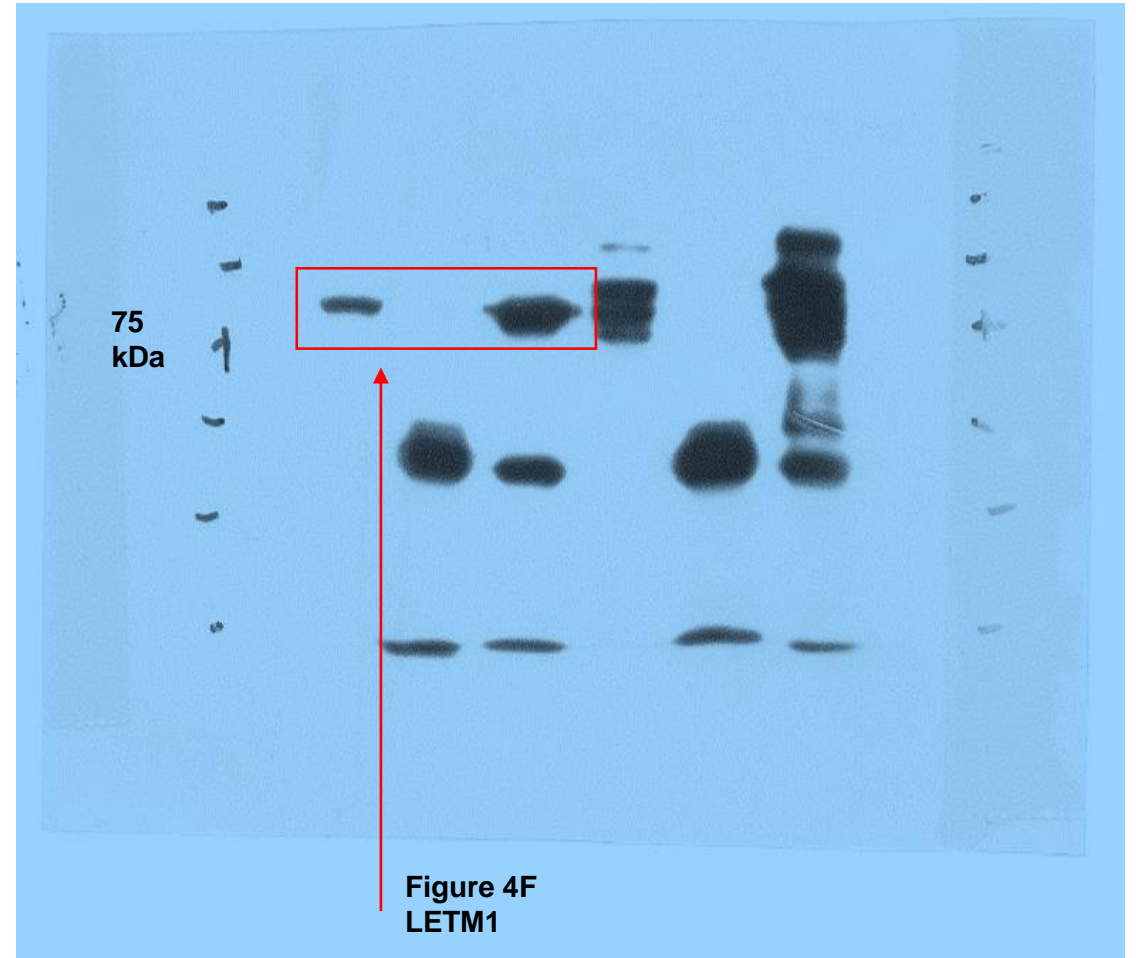

**Figure 5B anti-GRP78**

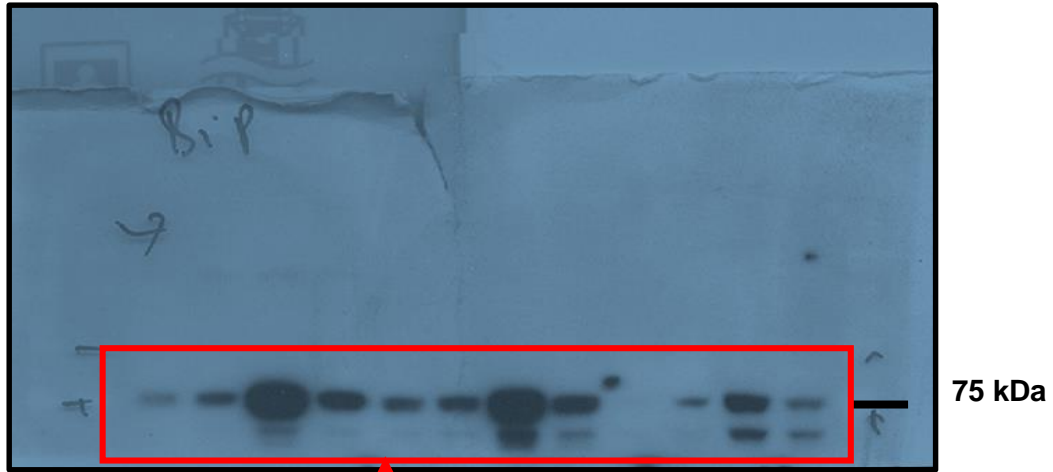

Figure 5B, GRP78

**Figure 5B anti-TOM40**

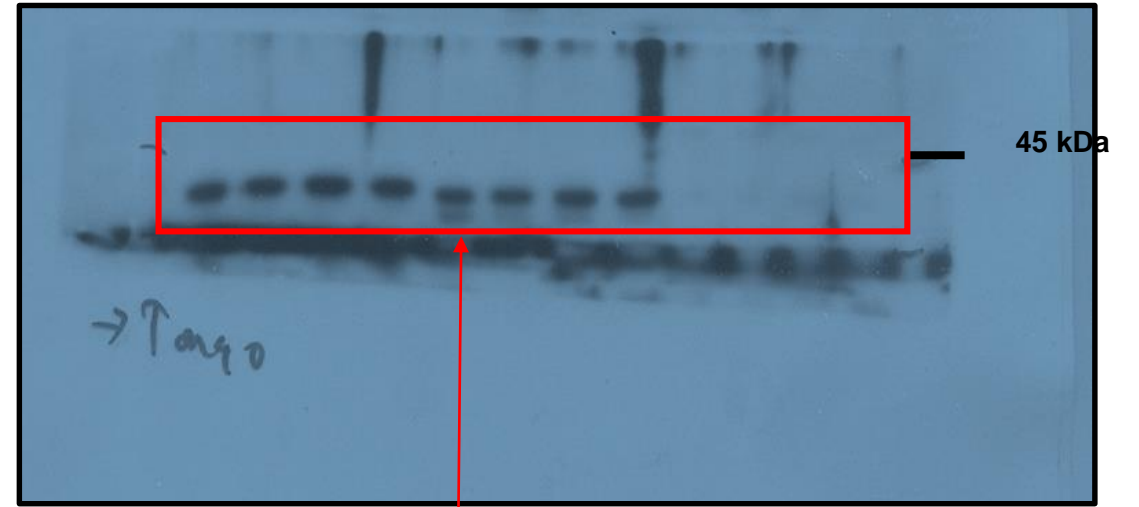

Figure 5B, TOM40

**Figure 5B anti-LETM1**

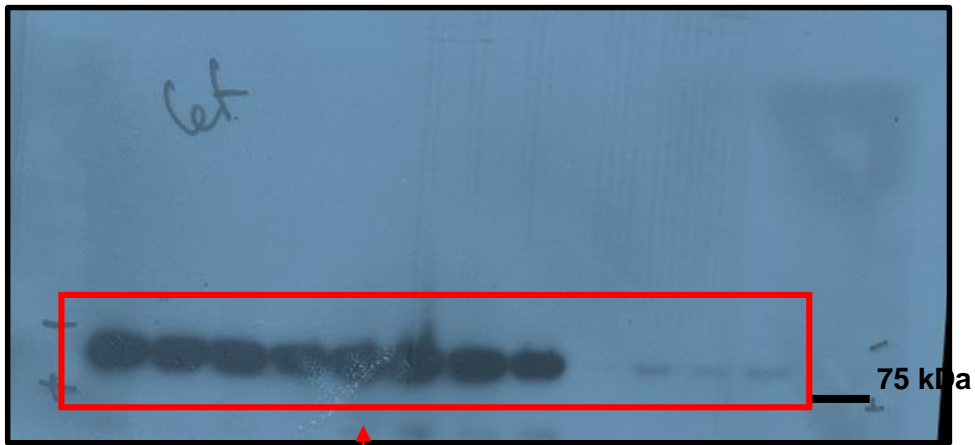

Figure 5B, LETM1

**Figure 5B anti-beta-tubulin**

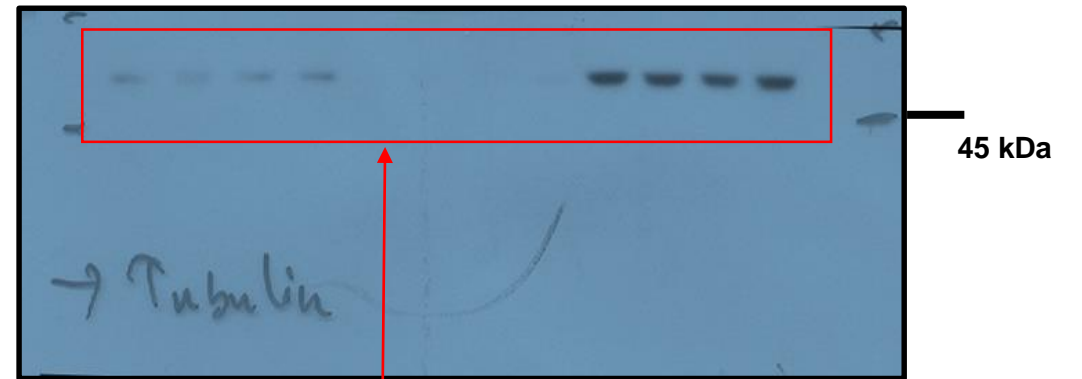

Figure 5B, Tubulin

**Figure 5C anti-GRP78**

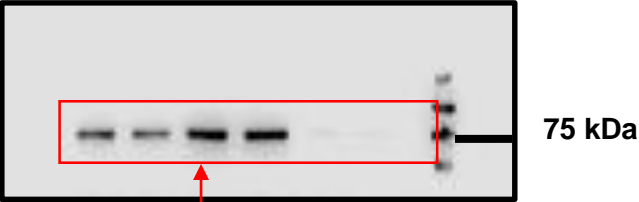

Figure 5C, GRP78

**Figure 5C anti-TOM40**

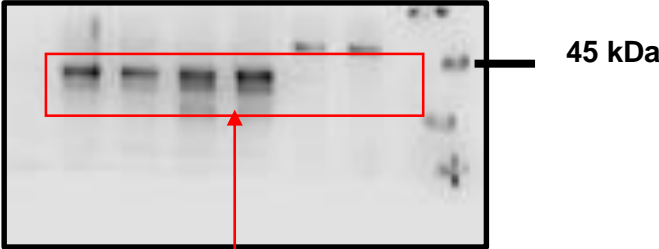

Figure 5C, TOM40

**Figure 5C anti-LETM1**

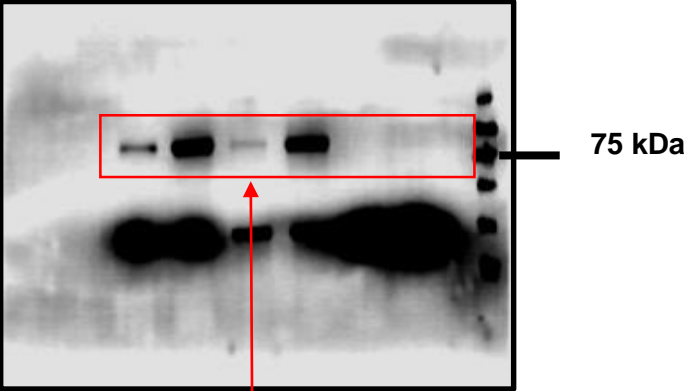

Figure 5C, LETM1

**Figure 5C anti-beta-actin**

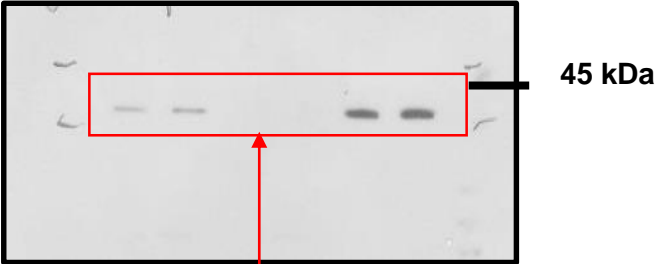

Figure 5C, Actin

**Figure 5E anti-LETM1**

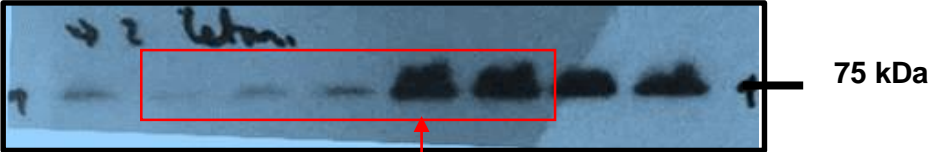

Figure 5E, LETM1

**Figure 5E anti-beta-actin**

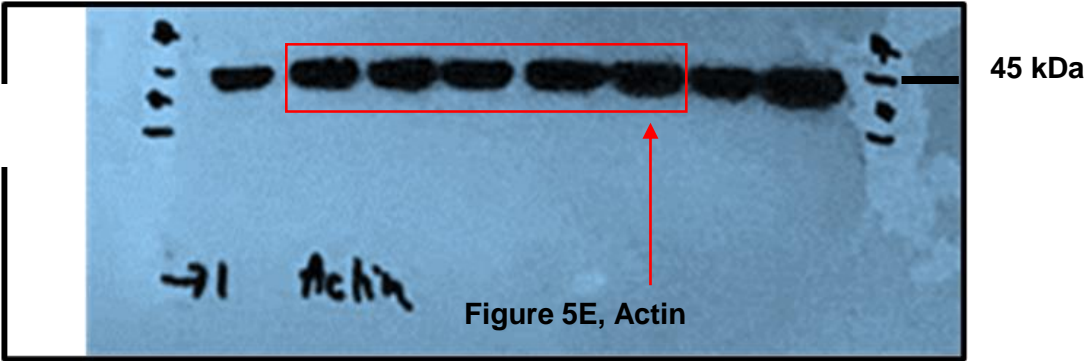

Figure 5E, Actin



**Figure 6C** anti-GRP785 and anti-GRP78

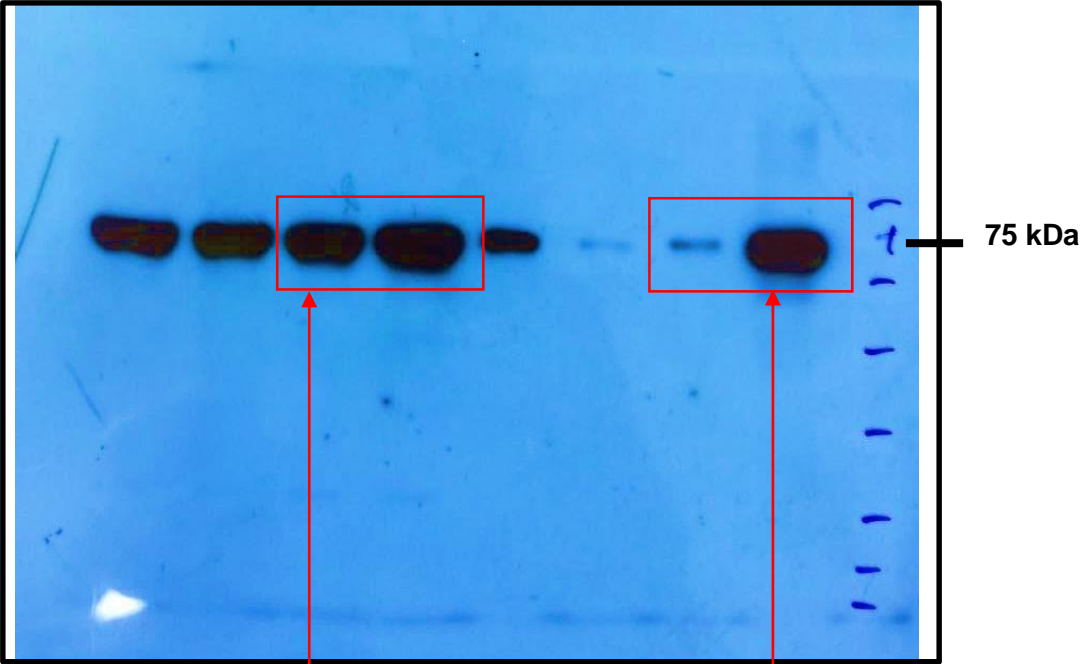

Figure 6C, GRP75, input

Figure 6C, GRP75 S.bead

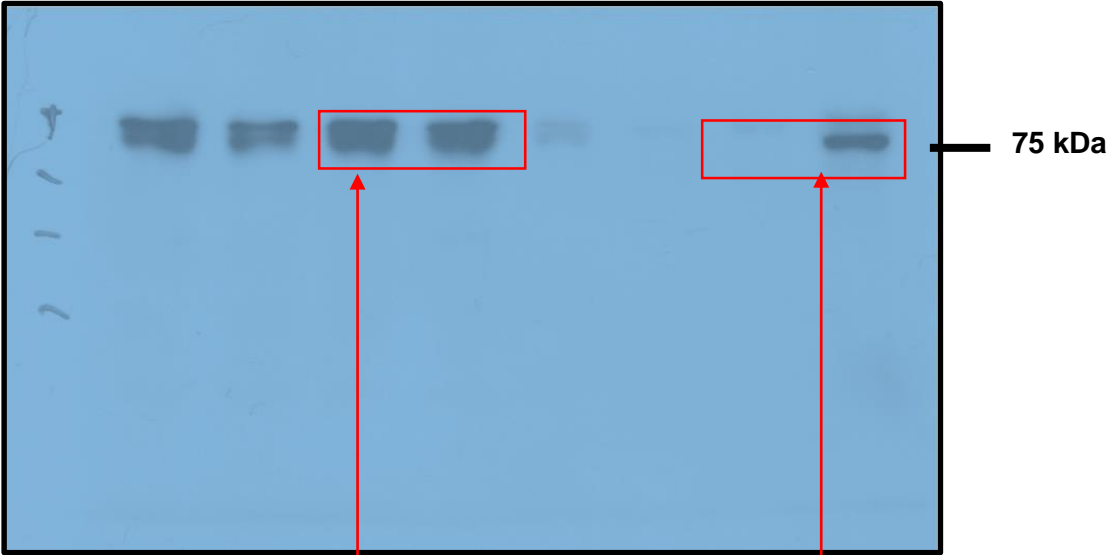

Figure 6C, GRP78, input

Figure 6C, GRP78 S.bead

**Figure 6D anti-GRP75**

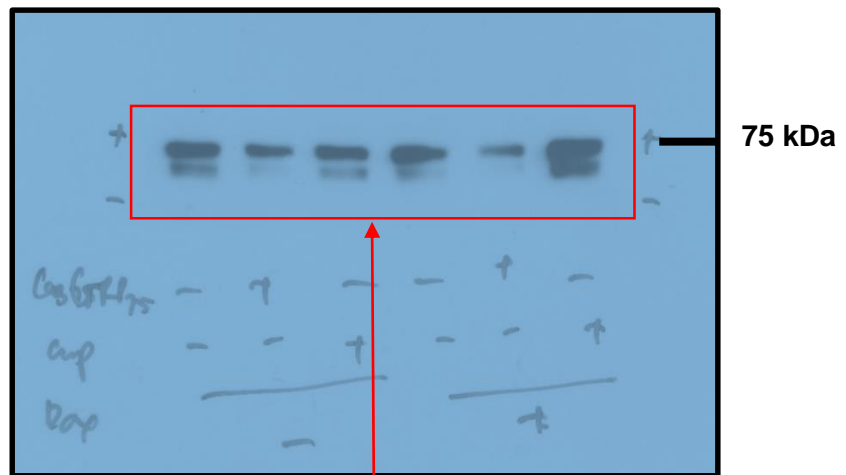

Figure 6D, GRP75

**Figure 6D anti-LC3B**

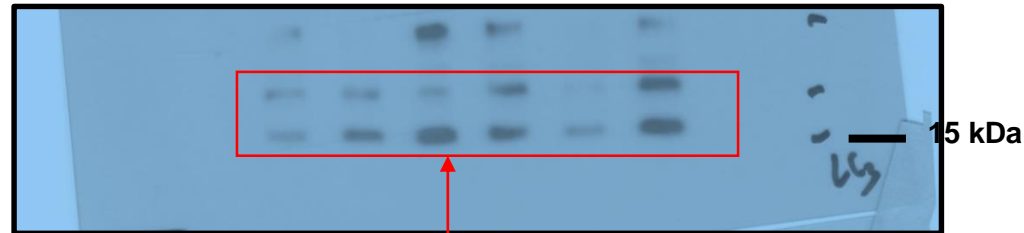

Figure 6D, LC3B

**Figure 6D anti-LETM1**

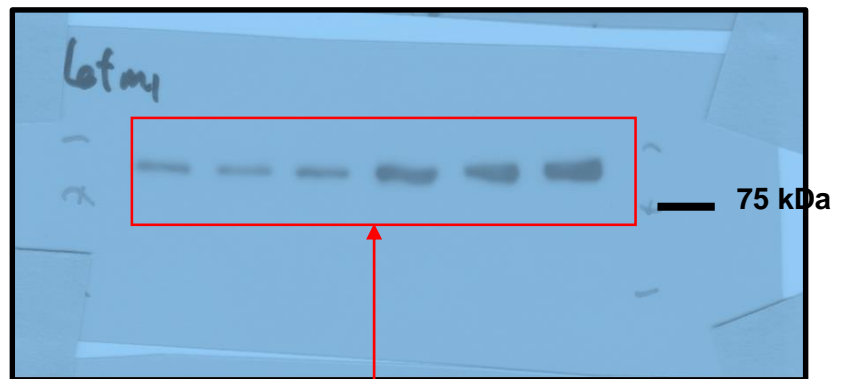

Figure 6D, LETM1

**Figure 6D anti-beta-actin**

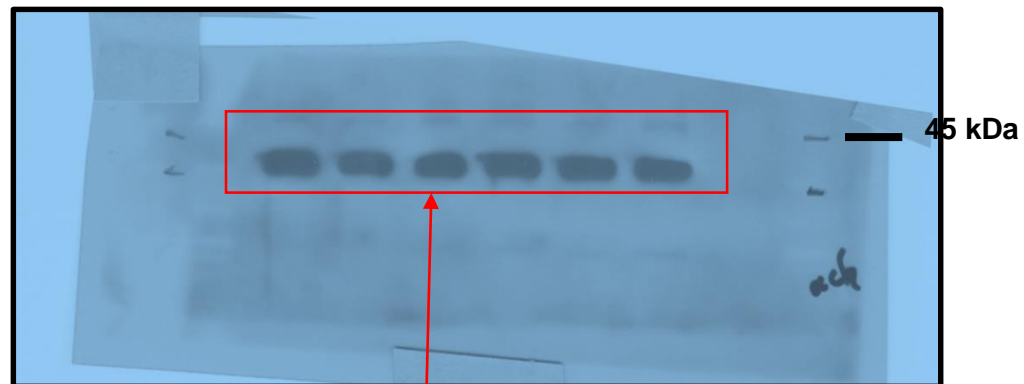

Figure 6D, Actin
